# Supplementary material
Source: ML conference proceedings conference paper supplement (https://proceedings.neurips.cc/paper_files/paper/2020/hash/4ee78d4122ef8503fe01cdad3e9ea4ee-Abstract.html)
Supplement: Supplementary file [file 4ee78d4122ef8503fe01cdad3e9ea4ee-Supplemental.pdf]

---

# Correlation Robust Influence Maximization: Supplementary Material

---

**Louis Chen\***  
Naval Postgraduate School  
Monterey, California

**Divya Padmanabhan†**  
SUTD  
Singapore

**Chee Chin Lim‡**  
SUTD  
Singapore

**Karthik Natarajan§**  
SUTD  
Singapore

## Broader Impact

The aim of this work is to address the possible pitfalls to the independence assumption in a social network, as used in the study of influence maximization. As discussed previously, how an idea, product, or piece of news makes its way through a network could very well be impacted by natural social biases, thus connecting parts of a social network in ways that could have been unforeseen. The methodology presented thus attempts to make this possibility a consideration during the selection of seed set, and hence find “influential” members to a network regardless of whatever underlying correlations may exist. This potentially can reduce the impact of biases that the independence assumption may cause.

## The Correlation Robust Influence Function $f^{corr}$

**Theorem 1** *Let  $G = (V, E)$  be a directed graph,  $\mathcal{S} \subseteq V$  a seed set, and  $\mathbf{p} \in [0, 1]^E$  a vector of edge likelihoods. Then  $\min_{\theta \in \Theta} \mathbf{E}_{\tilde{\mathbf{c}} \sim \theta} [Z(\tilde{\mathbf{c}}, \mathcal{S})]$  is the value to the following polynomial sized linear program.*

$$\begin{aligned} \min_{\theta \in \Theta} \mathbf{E}_{\tilde{\mathbf{c}} \sim \theta} [Z(\tilde{\mathbf{c}}, \mathcal{S})] &= \min_{\boldsymbol{\pi} \in \mathbb{R}^V} \sum_{i \in V \setminus \mathcal{S}} \pi_i \\ \text{s.t.} \quad &\pi_i = 1 \text{ for } i \in \mathcal{S}, \\ &\pi_i - \pi_j \leq 1 - p_{ij} \text{ for } (i, j) \in E, \\ &0 \leq \pi_i \leq 1 \text{ for } i \in V \end{aligned} \tag{3}$$

**Proof:** According to [1], if we let  $M$  assume a large value (anything at least  $|V \setminus \mathcal{S}|$ ), then  $\min_{\theta \in \Theta(p)} \mathbf{E}_{\tilde{\mathbf{c}} \sim \theta} [Z(\tilde{\mathbf{c}}, \mathcal{S})]$  can be formulated as the following linear program:

---

\*louis.chen@nps.edu

†divya\_padmanabhan@sutd.edu.sg

‡cheechin\_lim@sutd.edu.sg

§karthik\_natarajan@sutd.edu.sg

$$\begin{aligned}
& \min_{\pi \in \mathbb{R}^{V \cup \{s,t\}}, \lambda} \sum_{i,j \in E} 0 \cdot \lambda_{ij}^0 + M \cdot \lambda_{ij}^1 + \sum_{i \in \mathcal{S}} 0 \cdot \lambda_{si}^0 + M \cdot \lambda_{si}^1 + \sum_{i \in N \setminus \mathcal{S}} 0 \cdot \lambda_{it}^0 + \lambda_{it}^1 \\
& \text{subject to} \quad \pi_i - \pi_j \leq \lambda_{ij}^0 \quad \forall (i,j) \in E \\
& \quad \pi_i - \pi_j - (1 - p_{ij}) \leq \lambda_{ij}^1 \quad \forall (i,j) \in E \\
& \quad \pi_s - \pi_i \leq \lambda_{si}^0 \quad \forall i \in \mathcal{S} \\
& \quad \pi_s - \pi_i \leq \lambda_{si}^1 \quad \forall i \in \mathcal{S} \\
& \quad \pi_i - \pi_t \leq \lambda_{it}^0 \quad \forall i \in V \setminus \mathcal{S} \\
& \quad \pi_i - \pi_t \leq \lambda_{it}^1 \quad \forall i \in V \setminus \mathcal{S} \\
& \quad 0 \leq \pi \leq 1; \quad \forall i \in V \\
& \quad \lambda \geq 0 \\
& \quad \pi_s = 1, \pi_t = 0
\end{aligned}$$

Upon inspection, the program reduces to the desired program.  $\square$

**Corollary 1 (Correlation Robust Influence Likelihood)** *For an arbitrary seed set  $\mathcal{S}$  and vector of edge likelihoods  $\mathbf{p} \in [0, 1]^E$ , let  $\pi^*$  solve (3). Then for each  $i \in V \setminus \mathcal{S}$ ,*

$$\pi_i^* = \left[ \max_{\gamma \in \Gamma(\mathcal{S}, i)} L(\gamma) \right]^+,$$

$$\mathbb{P}_{\theta^*}(\text{Node } i \text{ is reachable from } \mathcal{S} \text{ in } G(\tilde{\mathbf{c}})) = \pi_i^* \quad \forall \theta^* \in \arg \min_{\theta \in \Theta} \mathbb{E}_{\tilde{\mathbf{c}} \sim \theta} [Z(\tilde{\mathbf{c}}, \mathcal{S})].$$

*In light of this, we define the **correlation robust influence likelihood of  $i$**  as  $\pi_i^*$ . In particular,  $\pi_i^*$  is no greater than the IC model's likelihood that  $i$  is influenced, that is,  $\pi_i^* \leq \mathbb{P}_{\theta_{ic}}(\text{Node } i \text{ is reachable from } \mathcal{S})$ .*

**Proof:** We begin by establishing the equality

$$\pi_i^* = \left[ \max_{\gamma \in \Gamma(\mathcal{S}, i)} L(\gamma) \right]^+.$$

Let  $i$  be such that  $\Gamma(\mathcal{S}, i) \neq \emptyset$ . Consider any path  $\gamma \in \Gamma(\mathcal{S}, i)$  and let  $\gamma = (i_0 \rightarrow i_1 \rightarrow i_2 \rightarrow \dots \rightarrow i_l = i)$ , where  $i_0 \in \mathcal{S}$ . Since  $\pi^*$  is feasible to (3), we must have,

$$\begin{aligned}
\pi_{i_0}^* - \pi_{i_1}^* &\leq 1 - p_{i_0, i_1} \\
\pi_{i_1}^* - \pi_{i_2}^* &\leq 1 - p_{i_1, i_2} \\
&\vdots \\
\pi_{i_{l-1}}^* - \pi_i^* &\leq 1 - p_{i_{l-1}, i_l}
\end{aligned}$$

Summation of these inequalities gives  $\pi_{i_0}^* - \pi_i^* \leq \sum_{l=1}^l (1 - p_{i_{l-1}, i_l})$ . Since  $i_0 \in \mathcal{S}$ , it follows that  $\pi_{i_0}^* = 1$ , so that  $\pi_i^* \geq L(\gamma)$ . Hence,  $\pi_i^* = \left[ \max_{\gamma \in \Gamma(\mathcal{S}, i)} L(\gamma) \right]^+$ .

On the other hand, observe that if  $\Gamma(\mathcal{S}, i) = \emptyset$ , then the decision variable  $\pi_i$  has no lower bound other than 0. Further,  $\left[ \max_{\gamma \in \Gamma(\mathcal{S}, i)} L(\gamma) \right]^+ = 0$ , in such a case, as desired.

We next establish the remaining equality

$$\mathbb{P}_{\theta^*}(\text{Node } i \text{ is reachable from } \mathcal{S}) = \pi_i^* \quad \forall \theta^* \in \arg \min_{\theta \in \Theta} \mathbb{E}_{\tilde{\mathbf{c}} \sim \theta} [Z(\tilde{\mathbf{c}}, \mathcal{S})].$$

Taking note of

$$\begin{aligned}
\min_{\theta \in \Theta} \mathbb{E}_{\theta} [Z(\tilde{\mathbf{c}}, \mathcal{S})] &= \min_{\theta \in \Theta} \sum_{i \in V \setminus \mathcal{S}} \mathbb{P}_{\theta}(\text{Node } i \text{ is reachable from } \mathcal{S} \text{ in } G(\tilde{\mathbf{c}})) \\
&\geq \sum_{i \in V \setminus \mathcal{S}} \min_{\theta \in \Theta} \mathbb{P}_{\theta}(\text{Node } i \text{ is reachable from } \mathcal{S} \text{ in } G(\tilde{\mathbf{c}})) \geq \sum_{i \in V \setminus \mathcal{S}} \left[ \max_{\gamma \in \Gamma(\mathcal{S}, i)} L(\gamma) \right]^+ \\
&= \sum_{i \in V \setminus \mathcal{S}} \pi_i^* = \min_{\theta \in \Theta} \mathbb{E}_{\theta} [Z(\tilde{\mathbf{c}}, \mathcal{S})],
\end{aligned}$$

and that for any  $i \in V \setminus \mathcal{S}$ , it holds that

$$\min_{\theta \in \Theta} \mathbb{P}_{\theta}(\text{Node } i \text{ is reachable from } \mathcal{S} \text{ in } G(\tilde{\mathbf{c}})) \geq \left[ \max_{\gamma \in \Gamma(\mathcal{S}, i)} L(\gamma) \right]^+,$$

so we arrive at the desired conclusion.  $\square$

**Corollary 2 (Path existence under Correlation Robustness)** *Let  $\mathcal{S}$  be an arbitrary seed set, and let  $\theta^* \in \Theta$  be any solution to  $\min_{\theta \in \Theta} \mathbb{E}_{\theta}[R(\tilde{\mathbf{c}}, \mathcal{S})]$ . Let  $\bar{\Gamma}(\mathcal{S}, i) := \arg \max_{\gamma \in \Gamma(\mathcal{S}, i)} L(\gamma)$ , and  $\pi^*$  is any optimal solution to (3). If  $i \notin \mathcal{S}$  and  $\max_{\gamma \in \Gamma(\mathcal{S}, i)} L(\gamma) > 0$ , then*

$$\mathbb{P}_{\theta^*}(\cup_{\gamma \in \bar{\Gamma}(\mathcal{S}, i)} [G(\tilde{\mathbf{c}}) \text{ contains path } \gamma]) = \pi_i^* = \mathbb{P}_{\theta^*}(\cap_{\gamma \in \bar{\Gamma}(\mathcal{S}, i)} [G(\tilde{\mathbf{c}}) \text{ contains path } \gamma]),$$

*In addition, if  $\max_{\gamma \in \Gamma(\mathcal{S}, i)} L(\gamma) > 0$ , then for any path  $\gamma \in \bar{\Gamma}(\mathcal{S}, i)$ , at most one of the arcs in  $\gamma$  is ever missing in the random graph  $G(\tilde{\mathbf{c}}) \sim \theta^*$ , almost surely.*

**Proof:** If  $\theta^*$  solves  $\min_{\theta \in \Theta} \mathbb{E}_{\theta}[R(\tilde{\mathbf{c}}, \mathcal{S})]$ ,  $i \notin \mathcal{S}$ , and  $\max_{\gamma \in \Gamma(\mathcal{S}, i)} L(\gamma) > 0$ , then for any  $\gamma^* \in \bar{\Gamma}(\mathcal{S}, i)$ ,

$$\begin{aligned} \max_{\gamma \in \Gamma(\mathcal{S}, i)} L(\gamma) &= \mathbb{P}_{\theta^*}(\text{Node } i \text{ is reachable from } \mathcal{S} \text{ in } G(\tilde{\mathbf{c}})) = \mathbb{P}_{\theta^*}(\cup_{\gamma \in \Gamma(\mathcal{S}, i)} [G(\tilde{\mathbf{c}}) \text{ contains path } \gamma]) \\ &\geq \mathbb{P}_{\theta^*}([G(\tilde{\mathbf{c}}) \text{ contains path } \gamma^*]) \stackrel{(5)}{\geq} L(\gamma^*) = \max_{\gamma \in \Gamma(\mathcal{S}, i)} L(\gamma). \end{aligned}$$

So we conclude that

$$\mathbb{P}_{\theta^*}(\cup_{\gamma \in \bar{\Gamma}(\mathcal{S}, i)} [G(\tilde{\mathbf{c}}) \text{ contains path } \gamma]) = \mathbb{P}_{\theta^*}([G(\tilde{\mathbf{c}}) \text{ contains path } \gamma^*]),$$

which implies

$$\begin{aligned} \mathbb{P}_{\theta^*}(\cup_{\gamma \in \bar{\Gamma}(\mathcal{S}, i)} [G(\tilde{\mathbf{c}}) \text{ contains path } \gamma]) &\geq \mathbb{P}_{\theta^*}([G(\tilde{\mathbf{c}}) \text{ contains path } \gamma^*]) \\ &= \mathbb{P}_{\theta^*}(\cup_{\gamma \in \Gamma(\mathcal{S}, i)} [G(\tilde{\mathbf{c}}) \text{ contains path } \gamma]), \end{aligned}$$

as desired.

For the remaining equality in the statement, we note that if

$$\mathbb{P}_{\theta^*}(\cap_{\gamma \in \bar{\Gamma}(\mathcal{S}, i)} [G(\tilde{\mathbf{c}}) \text{ contains path } \gamma]) < \mathbb{P}_{\theta^*}([G(\tilde{\mathbf{c}}) \text{ contains path } \gamma^*]),$$

then  $\mathbb{P}_{\theta^*}([G(\tilde{\mathbf{c}}) \text{ contains path } \gamma^*] \setminus [G(\tilde{\mathbf{c}}) \text{ contains path } \gamma']) > 0$  for some  $\gamma' \in \bar{\Gamma}(\mathcal{S}, i)$ , which means

$$\begin{aligned} \mathbb{P}_{\theta^*}(\cup_{\gamma \in \Gamma(\mathcal{S}, i)} [G(\tilde{\mathbf{c}}) \text{ contains path } \gamma]) &\geq \mathbb{P}_{\theta^*}([G(\tilde{\mathbf{c}}) \text{ contains path } \gamma']) \\ &\quad + \mathbb{P}_{\theta^*}([G(\tilde{\mathbf{c}}) \text{ contains path } \gamma^*] \setminus [G(\tilde{\mathbf{c}}) \text{ contains path } \gamma']) \\ &> \mathbb{P}_{\theta^*}([G(\tilde{\mathbf{c}}) \text{ contains path } \gamma^*] \setminus [G(\tilde{\mathbf{c}}) \text{ contains path } \gamma']), \end{aligned}$$

a contradiction.

As for the last statement, if  $\gamma \in \bar{\Gamma}(\mathcal{S}, i)$ , we observe that under the joint distribution  $\theta^*$  it cannot be the case that - with positive probability - more than one arc is missing from  $G(\tilde{\mathbf{c}})$ , else (5) would be a strict inequality, contradicting the fact that Corollary 1 implies that it should be an equality.  $\square$

**Corollary 3** *Given an arbitrary seed set  $\mathcal{S}$  and vector of edge likelihoods  $\mathbf{p} \in [0, 1]^E$ , let  $\pi^*$  denote the optimal solution to (3). Let  $\tilde{q} \sim \text{Unif}[0, 1]$ ,  $V(\tilde{q}) := \{i : \tilde{q} < \pi_i^*\}$ ,*

$$E(\tilde{q}) := \{(k, j) : \pi_k^* > \pi_j^*, \tilde{q} \notin [\pi_k^* - 1 + p_{kj}, \pi_k^*]\} \cup \{(k, j) : \pi_k^* \leq \pi_j^*, \tilde{q} \in (0, p_{kj}]\},$$

*and  $\mathbf{c}(\tilde{q}) \in \{0, 1\}^E$  be such that  $c(\tilde{q})_{ij} = 1$  iff  $(i, j) \in E(\tilde{q})$ . Then  $\mathbf{c}(\tilde{q}) \sim \theta^*$  for some  $\theta^*$  solving Equation (1). In particular,  $V(\tilde{q})$  is the set of all nodes reachable from  $\mathcal{S}$  in the graph  $G(\tilde{q}) = (V, E(\tilde{q}))$ , so that  $\mathbb{E}_{\tilde{q}}[|V(\tilde{q})|] = \min_{\theta \in \Theta} \mathbb{E}_{\tilde{\mathbf{c}} \sim \theta}[R(\tilde{\mathbf{c}}, \mathcal{S})] = |\mathcal{S}| + \mathbb{E}_{\tilde{q}}[Z(\mathbf{c}(\tilde{q}), \mathcal{S})]$ .*

**Proof:** Consider the max-flow problem of  $Z(c, \mathcal{S})$  for arbitrary  $c \in \{0, 1\}^E$ . Then the two collections  $\{s\} \cup \mathcal{S} \cup \{j : x_{jt}^* = 1, j \in V \setminus \mathcal{S}\}$  and  $\{t\} \cup \{j : x_{jt}^* = 0, j \in V \setminus \mathcal{S}\}$  form a minimum  $s$ - $t$  cut. In particular,  $\{j : x_{jt}^* = 1, j \in V \setminus \mathcal{S}\}$  is precisely the set of nodes outside of  $\mathcal{S}$  that are reached, and  $j$  is reached if and only if the edge  $(j, t)$  runs across this minimum cut.

With  $\pi^*$  an optimal solution to (3), we may characterize a  $\theta^* \in \Theta$  consistent with  $\mathbf{p}$  that solves  $\min_{\theta \in \Theta} \mathbf{E}[Z(\tilde{c}, \mathcal{S})] = \min_{\theta \in \Theta} \mathbf{E}[R(\tilde{c}, \mathcal{S})] - |\mathcal{S}|$ . This characterization will be defined on the probability space  $((0, 1], \mathcal{B}, \lambda)$ , and for the sake of notation, in the following we'll let  $F_{ij}$  denote the cdf for edge  $(i, j)$  that is live with probability  $\mathbf{p}_{ij}$ . For all  $(i, j) \in E$ , if  $\pi_i^* > \pi_j^*$ , define for all  $q \in (0, 1]$ ,

$$\tilde{c}_{ij}(q) := \begin{cases} F_{ij}^{-1}(q - \pi_j^*); & \pi_j^* < q \leq \pi_i^* \\ F_{ij}^{-1}(1 - p_{ij} + q); & 0 < q \leq \pi_i^* - (1 - p_{ij}) \\ F_{ij}^{-1}(1 - p_{ij} - \pi_j^* + q); & \pi_i^* - (1 - p_{ij}) < q \leq \pi_j^* \\ F_{ij}^{-1}(q); & \pi_i^* < q \leq 1, \end{cases}$$

otherwise if  $\pi_i^* \leq \pi_j^*$  define  $\tilde{c}_{ij}(q) := F_{ij}^{-1}(1 - q)$ . Finally, for all  $(i, j) \notin E$  but are auxillary arcs with  $s$  or  $t$  as an endpoint, we can let  $\tilde{c}_{ij}(q) := +\infty$  if  $i = s$ , else  $\tilde{c}_{ij}(q) := 1$  for the case that  $j = t$ . As well, we define

$$\tilde{\chi}_{ij}(q) := \begin{cases} 1; & \pi_i^* > \pi_j^*, q \in [\pi_j^*, \pi_i^*] \\ 0; & \text{otherwise.} \end{cases}$$

The resulting random vector  $\tilde{c}$  has as its distribution a solution to  $\min_{\theta \in \Theta} \mathbf{E}[Z(\tilde{c}, \mathcal{S})]$ . This follows after adopting the arguments in Theorem 3.1 of [1]. It is not hard to see that with  $\tilde{q} \sim \text{Unif}(0, 1]$ ,  $E(\tilde{q})$  as defined in the statement is precisely  $\{(k, j) : \tilde{c}_{kj}(\tilde{q}) = 1\}$ . Furthermore, according to Theorem 3.1 of [1],  $\tilde{\chi}_{jt}(\tilde{q})$  is 1 if and only if  $(j, t)$  runs across the minimum cut - equivalently, when  $j$  is reached. And since  $\pi_i^* = 0$  always, we arrive at the characterization of  $V(\tilde{q})$ .  $\square$

## Correlation Robustness: Maximization and Robust Ratios

**Theorem 2** *The problem of computing  $\max_{\mathcal{S}: |\mathcal{S}| \leq k} f^{\text{corr}}(\mathcal{S})$ , given a graph  $G = (V, E)$ , a vector of edge likelihoods  $\mathbf{p} \in [0, 1]^E$ , and an integer number  $k$ , is NP-Hard. In particular, we have the following exact formulation as a mixed-integer program.*

$$\begin{aligned} \max_{\mathcal{S}: |\mathcal{S}| \leq k} f_p^{\text{corr}}(\mathcal{S}) &= \max \sum_{(i,j) \in E} z_{ij}(p_{ij} - 1) + \sum_{i \in V} w_i \\ &1 - y_i - \sum_{j: (j,i) \in E} z_{ji} + \sum_{j: (i,j) \in E} z_{ij} \geq 0 \quad \forall i \in V \\ &w_i \geq |V|x_i + y_i - |V| \quad \forall i \in V \\ &w_i \leq \min(|V|x_i, y_i) \quad \forall i \in V \\ &\sum_{i \in V} x_i = k \\ &y_i \geq 0 \quad w_i \geq 0 \quad \forall i \in V \\ &z_{ij} \geq 0 \quad \forall (i, j) \in E \\ &x_i \in \{0, 1\} \quad \forall i \in V \end{aligned}$$

**Proof:** We prove the hardness of computing  $\max_{\mathcal{S}: |\mathcal{S}| \leq k} f^{\text{corr}}(\mathcal{S})$  through a reduction from the set cover problem. The proof is along the lines of the proof of hardness of the independent cascade model in [2]. In the set cover problem, there is a universe of elements  $\Omega = \{1, \dots, n\}$ , a collection of subsets  $J_1, \dots, J_m \subseteq \Omega$  (whose union gives  $\Omega$ ), and an integer  $k$ . The decision version of the set cover problem is to check if there exists a collection of  $k$  subsets, whose union gives  $\Omega$ . We will now reduce an instance of set cover problem to (2). For this, consider a bipartite graph with a total of  $m + n$  vertices corresponding to the  $m$  subsets and the  $n$  elements of  $\Omega$ . This bipartite graph contains an edge between a subset node  $i$  and an element node  $j$  if  $j \in J_i$ . Fix  $p_{ij} = 1$  for all edges  $(i, j)$  in this graph. Then there exist  $k$  subsets whose union is  $\Omega$  if and only if the optimal value to (2) is  $k + n$ .

Next we will derive the MILP formulation. Using Theorem 1, we have,

$$\begin{aligned}
\max_{\mathcal{S}:|\mathcal{S}|\leq k} f_p^{corr}(\mathcal{S}) &= \max_{x \in \mathbb{R}^V} \min_{\pi \in \mathbb{R}^V} \sum_i \pi_i \\
\text{subject to} & \quad x_i \leq \pi_i \quad \forall i \in V \\
& \quad \pi_i - \pi_j \leq 1 - p_{ij} \quad \forall (i, j) \in E \\
& \quad 0 \leq \pi_i \leq 1 \quad \forall i \in V \\
& \quad \sum_{i \in V} x_i = k \\
& \quad x_i \in \{0, 1\} \quad \forall i \in V
\end{aligned}$$

The dual of the inner minimization problem is,

$$\max_{z \geq 0, y \geq 0, w \geq 0} \sum_{(i,j) \in E} z_{ij}(p_{ij} - 1) + \sum_{i \in V} x_i y_i : 1 - y_i - \sum_{j:(j,i) \in E} z_{ji} + \sum_{j:(i,j) \in E} z_{ij} \geq 0 \quad \forall i \in V$$

Further we linearize the product terms  $w_i = x_i y_i$ . Summing up the inequality over all  $i$  gives us,  $\sum_{i \in V} (1 - y_i - \sum_{j:(j,i) \in E} z_{ji} + \sum_{j:(i,j) \in E} z_{ij}) \geq 0$ . The terms involving  $z$  cancel out and we are left with  $\sum_{i \in V} y_i \leq V$  and since  $y_i \geq 0$  for all  $i$ , we get an upper bound  $y_i \leq V$ .

Using the bounds  $0 \leq x_i \leq 1$  and  $0 \leq y_i \leq |V|$ , the McCormick inequalities introduced in [3] for  $w_i$  give us,

$$|V|x_i + y_i - |V| \leq w_i \leq \min(|V|x_i, y_i) \quad \forall i \in V$$

To see that these inequalities are sufficient to capture  $w_i = x_i y_i$ , when  $x_i \in \{0, 1\}$ , first let  $x_i = 0$ . Then the inequalities give us  $y_i - |V| \leq w_i \leq \min(0, y_i)$  and along with the fact that  $w_i \geq 0$ , we get  $w_i = 0$ . Now Let  $x_i = 1$ . Then the inequalities give us  $y_i \leq w_i \leq \min(|V|, y_i) = y_i$ . Therefore we get  $w_i = y_i$  and hence these inequalities are tight.  $\square$

**Theorem 3** *The correlation robust influence function  $f^{corr} : 2^V \rightarrow \mathbb{R}_+$  is a monotone, submodular function.*

**Proof:** Since  $f^{corr}(\mathcal{S}) = |\mathcal{S}| + \min_{\theta \in \Theta} \mathbb{E}_\theta[Z(\tilde{c}, \mathcal{S})]$ , submodularity of  $g(\mathcal{S}) := \min_{\theta \in \Theta} \mathbb{E}_{\tilde{c} \sim \theta} Z[\tilde{c}, \mathcal{S}]$  implies submodularity of  $f^{corr}$ . If two seed sets  $S$  and  $T$  with  $S \subset T$  and vertex  $v \notin T$  are given, then by (7),

$$\begin{aligned}
g(S+v) - g(S) &= \sum_{i \notin (S \cup v)} \max \left( \left[ \max_{\gamma \in \Gamma(S, i)} L(\gamma) \right]^+, \left[ \max_{\gamma \in \Gamma(\{v\}, i)} L(\gamma) \right]^+ \right) \\
&\quad - \left[ \sum_{i \notin (S+v)} \left[ \max_{\gamma \in \Gamma(S, i)} L(\gamma) \right]^+ + \left[ \max_{\gamma \in \Gamma(S, v)} L(\gamma) \right]^+ \right] \\
&= \sum_{i \notin (S+v)} \left[ \left[ \max_{\gamma \in \Gamma(\{v\}, i)} L(\gamma) \right]^+ - \left[ \max_{\gamma \in \Gamma(S, i)} L(\gamma) \right]^+ \right]^+ - \left[ \max_{\gamma \in \Gamma(S, v)} L(\gamma) \right]^+ \quad (1) \\
&\geq \sum_{i \notin (T+v)} \left[ \left[ \max_{\gamma \in \Gamma(\{v\}, i)} L(\gamma) \right]^+ - \left[ \max_{\gamma \in \Gamma(T, i)} L(\gamma) \right]^+ \right]^+ - \left[ \max_{\gamma \in \Gamma(T, v)} L(\gamma) \right]^+ \\
&= g(T+v) - g(T),
\end{aligned}$$

as desired. As for monotonicity, simply observe that by (1),

$$f^{corr}(S+v) - f^{corr}(S) = g(S+v) - g(S) + 1 \geq 1 - \left[ \max_{\gamma \in \Gamma(S, v)} L(\gamma) \right]^+ \geq 0.$$

$\square$

**Corollary 4** *Let  $\mathcal{S}_{corr}^g$  denote the seed set generated upon termination of the greedy algorithm for maximization of  $f^{corr}$ . Then*

$$f^{corr}(\mathcal{S}_{corr}^g) \geq (1 - 1/e) \max_{|\mathcal{S}| \leq k} f^{corr}(\mathcal{S})$$

**Proof:** By Theorem 3 and known approximation guarantees for submodular optimization [4] we get the result.  $\square$

### Computations for Example 2, POC study

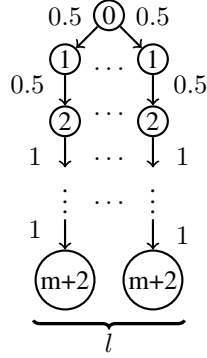

Figure 1: Example 2 for POC study

We consider the tree in Figure 1 with a root node, containing  $l$  children. There are a total of  $l$  paths from the root to all the leaf nodes, starting from the root node. Each path contains  $m + 2$  nodes (apart from the root). The labels on the nodes indicate the “type” of each node. Between nodes of type 0 and 1 as well as between type 1 and type 2 nodes, the activation probability = 0.5. For all other edges, activation probability is 1. The total number of nodes in the graph is  $n = l(m + 2) + 1$ . Suppose we are interested in choosing a single seed node, so  $k = 1$ .

*Independent cascade model:* We first compute the values of  $f^{ic}(\cdot)$  for each type of node.

Type 2: For such nodes,  $f^{ic}(\{2\}) = m + 1$ . Also it can be verified that nodes of type 2 reach more than nodes of type 3, 4,  $\dots$   $m + 2$ .

Type 1: There is one random edge which, if active, will enable  $m + 1$  nodes to be reached. However if this edge is inactive, none of the nodes are reached. Therefore,  $f^{ic}(\{1\}) = \frac{m+1}{2} + 1$ .

Type 0 (root): Here we are  $l$  sub-trees (each corresponding to a path graph) in which the nodes could be potentially reached. Let the number of nodes reached in each of the sub-trees be denoted by the random variables  $\tilde{X}_1, \dots, \tilde{X}_l$ . The object of our interest is  $\mathbb{E}_{\theta_{ic}} \left[ \sum_{i=1}^l \tilde{X}_i \right] + 1$ .  $\tilde{X}_i$  takes values  $m + 2, 1$  and  $0$  with probabilities  $0.25, 0.25$  and  $0.5$  respectively. and therefore  $\mathbb{E}[\tilde{X}_i] = (m + 3)/4$ . Therefore the overall reachability  $f^{ic}(\{0\}) = 1 + l(m + 3)/4$ .

Clearly the choice to be made is between the root node and any node of type 2 (as node 2 is always better than node 1 (assuming  $m \geq 1$ ). The root node is preferred when  $l(m + 3)/4 \geq m$  which occurs when  $l \geq \frac{4m}{m+3}$ .

*Worst case analysis:* We perform a similar analysis on the values of  $f^{corr}(\cdot)$  too. For any type 2 node, we have  $f^{corr}(\{2\}) = m + 1$ . When  $\mathcal{S} = \{1\}$ ,  $f^{corr}(\{1\}) = 1 + \frac{m+1}{2}$  as an optimal solution to the LP that computes  $f^{corr}(\{1\})$  is  $\pi_2^* = \pi_3^* = \dots = \pi_{m+2}^* = 0.5$  from Corollary 1.

Type 0 (root): In each sub-tree of the root node, our LP solution gives  $\pi_1^* = 0.5, \pi_2^* = \pi_3^* = \dots = \pi_{m+2}^* = 0$ . Therefore  $f^{corr}(\{0\}) = 1 + l/2$ .

Between type 0 and type 2 nodes, type 0 is selected whenever  $l > 2m$  and a type 2 node can be selected otherwise.

Suppose  $\frac{4m}{m+3} \leq l \leq 2m$ . Then if  $k = 1$ ,  $\mathcal{S}_{corr}$  is any one of the type 2 nodes while  $\mathcal{S}_{ic} = \{0\}$ . Then the price of correlations is  $\frac{(l/2)+1}{m+1}$ . If  $l = \frac{4m}{m+3}$ , then  $POC = \frac{2m+3}{(m+1)(m+3)}$  which tends to zero as  $m \rightarrow \infty$ .

## References

- [1] Louis L Chen, Will Ma, James B Orlin, and David Simchi-Levi. Distributionally robust max flows. In *Symposium on Simplicity in Algorithms*, pages 81–90. SIAM, 2020.
- [2] David Kempe, Jon Kleinberg, and Éva Tardos. Maximizing the spread of influence through a social network. In *Proceedings of the ninth ACM SIGKDD international conference on Knowledge discovery and data mining*, pages 137–146, 2003.
- [3] Garth P. McCormick. Computability of global solutions to factorable nonconvex programs: Part I — Convex underestimating problems. *Mathematical Programming*, 10(1):147–175, 1976.
- [4] George L Nemhauser, Laurence A Wolsey, and Marshall L Fisher. An analysis of approximations for maximizing submodular set functions—I. *Mathematical programming*, 14(1):265–294, 1978.
